# Supplementary material
Source: MDPI journal article supplement (https://www.mdpi.com/2227-9717/8/10/1320)
Supplement: s1 [file s1]

Article

# Insulin Release from NPH Insulin-Loaded Pluronic® F127 Hydrogel in the Presence of Simulated Tissue Enzyme Activity

Muhammad H. Sultan <sup>1,3</sup>, Wael A. Mahdi <sup>2,3</sup> and Young M. Kwon <sup>3,\*</sup>

<sup>1</sup> Department of Pharmaceutics, College of Pharmacy, Jazan University, Jazan 45142, Saudi Arabia; msultan151@gmail.com

<sup>2</sup> Department of Pharmaceutics, College of Pharmacy, King Saud University, Riyadh 11451, Saudi Arabia; wael.mahdi@gmail.com

<sup>3</sup> Department of Pharmaceutical Sciences, College of Pharmacy, Nova Southeastern University, Fort Lauderdale 33314, FL, USA

\* Correspondence: ykwon@nova.edu, Tel.: +1-954-262-1382

Received: 16 September 2020; Accepted: 19 October 2020; Published: date

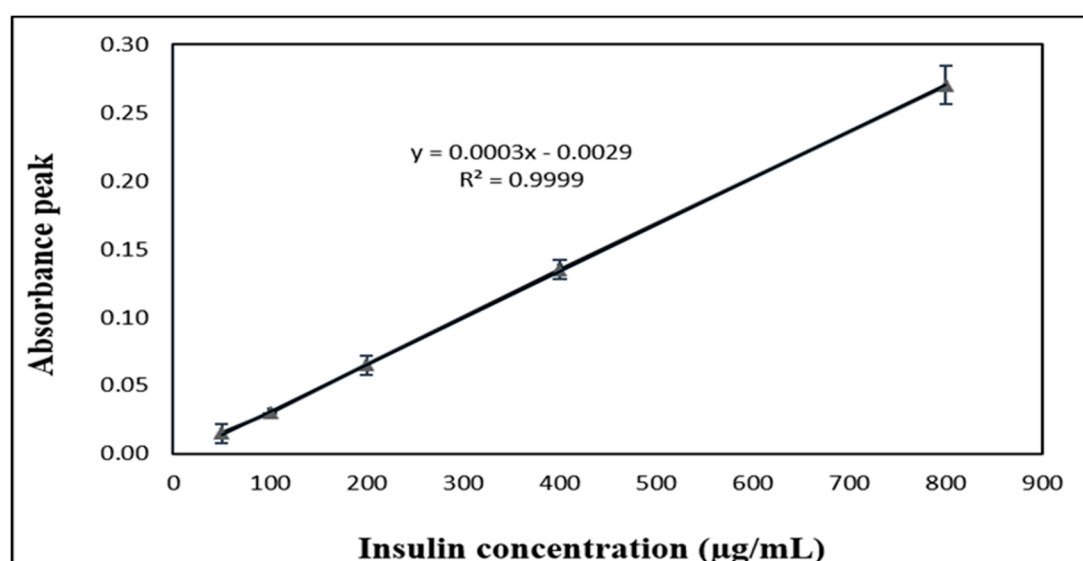

**Figure 1.** Insulin concentration plotted against absorbance peak height (calibration curve) for insulin recovery study(Figure 1). Data represent mean  $\pm$  SD, n=3.

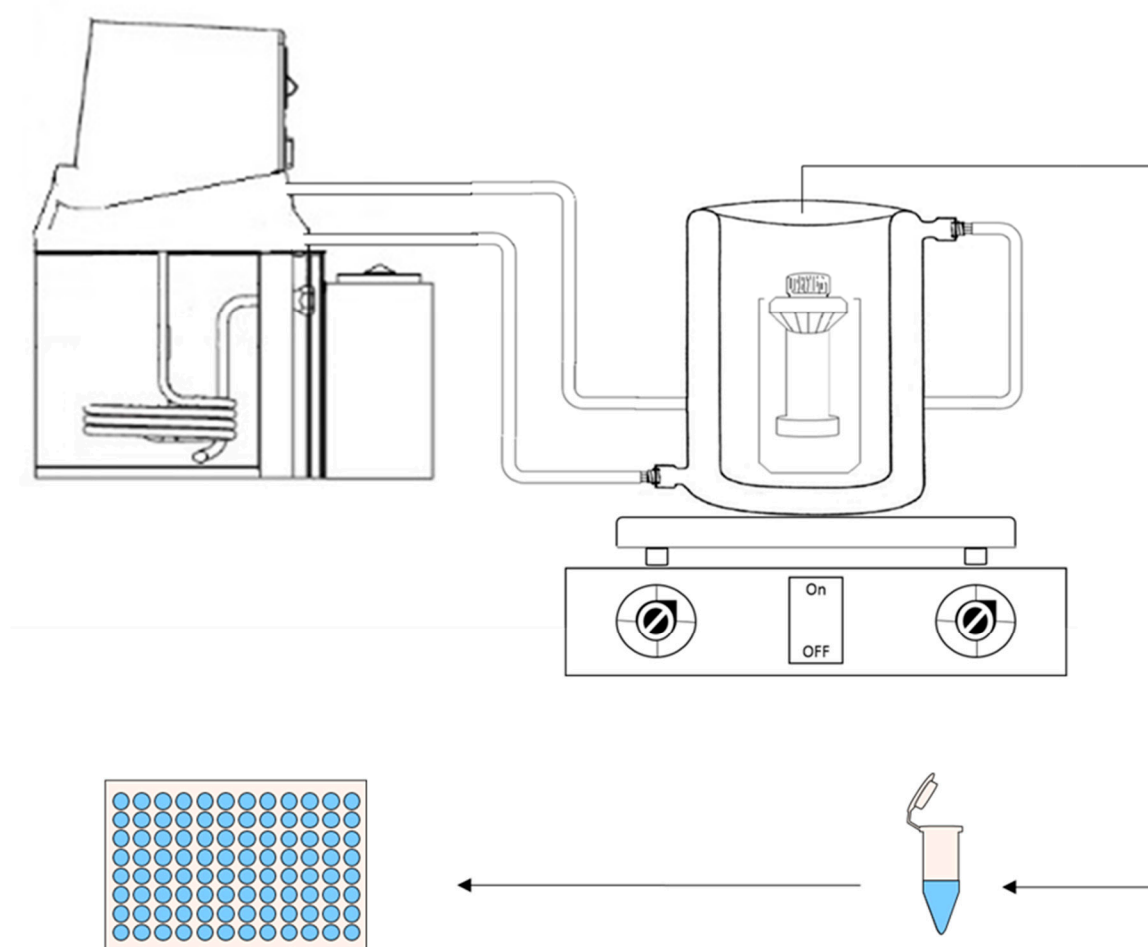

**Figure 2.** Schematic of instrumental setup for in vitro release studies.

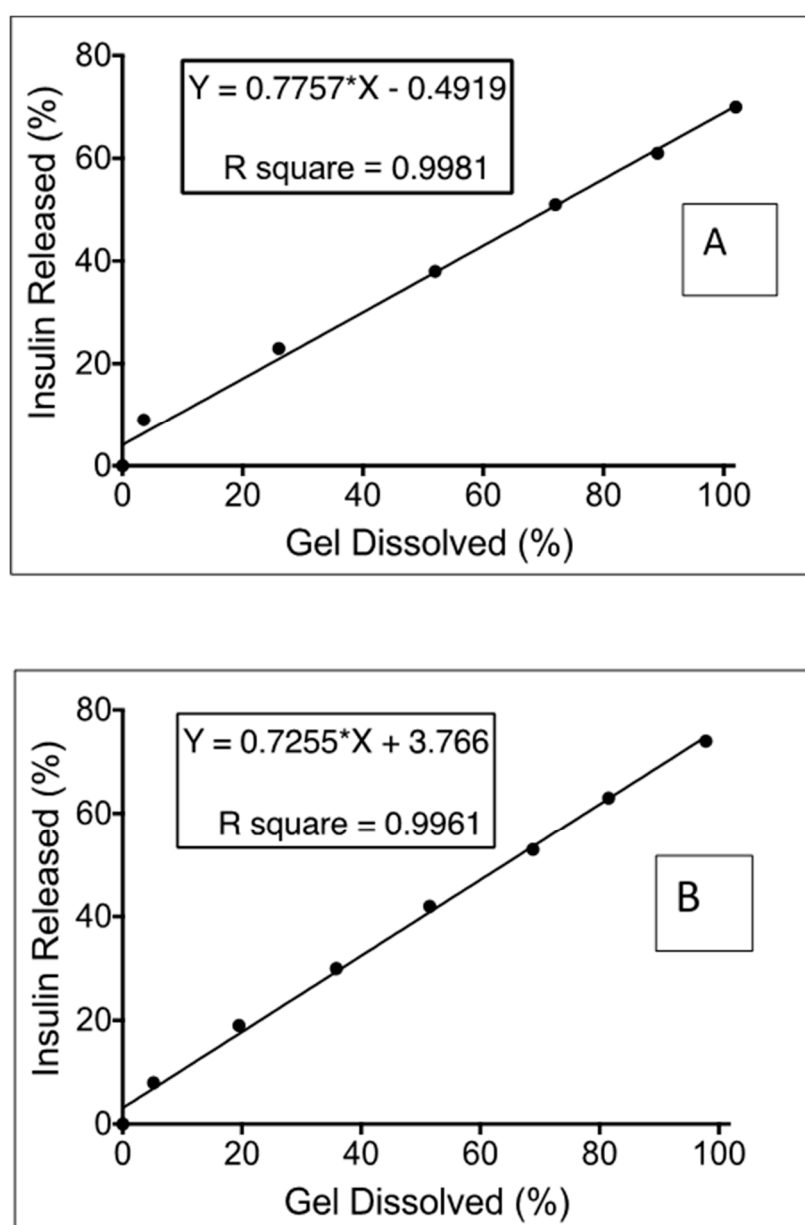

**Figure 3.** Correlation of cumulative % insulin release vs. %gel mass loss for. (A)NPH-PF127 (20%), and (B) NPH-PF127 (25%).
